# Supplementary material for: World Science against COVID-19: Gender and Geographical Distribution of Research
Source: bioRxiv or medRxiv preprint supplement (doi:10.1101/2021.09.29.21264261), 2021-09-29
Supplement: Supplementary file [file media-1.pdf]

## SUPPLEMENTARY INFORMATION

### World Science against COVID-19: Gender and Geographical Distribution of the Research

#### Method

Records extracted on 10-13 May 2021 from the **SCI-EXPANDED** (Science Citation Index Expanded) from the Web of Science (Clarivate Analytics)

All the Articles on **COVID-19** or **SARS-CoV-2** were obtained.

SEARCH:

TOPIC: (COVID-19) OR TOPIC: (SARS-CoV-2)

Refined by: DOCUMENT TYPES: (ARTICLE)

Timespan: All years. Indexes: SCI-EXPANDED.

**TOTAL: 40,765 Articles; 340,868 Authorships.**

Fields (authors, title, journal, year, etc) extracted with the **BIBEXCEL** software: <https://homepage.univie.ac.at/juan.gorraiz/bibexcel/>

Persson, O., R. Danell, J. Wiborg Schneider. 2009. How to use Bibexcel for various types of bibliometric analysis. In Celebrating scholarly communication studies: A Festschrift for Olle Persson at his 60th Birthday, ed. F. Åström, R. Danell, B. Larsen, J. Schneider, p 9–24. Leuven, Belgium: International Society for Scientometrics and Informetrics.

**Gender of Authorships** identified (92.2%) by means of the following databases:

GenderChecker: <https://genderchecker.com/>

GenderAPI: <https://genderapi.io/>

and Google Search / Images.

Table S1. All data organized by countries (according with the corresponding address).

|                 | Articles | %   | Authorships | Authors/<br>Article | Known<br>Gender | Men  | %     | Women | %    |
|-----------------|----------|-----|-------------|---------------------|-----------------|------|-------|-------|------|
| Afghanistan     | 3        | 0.0 | 12          | 4.00                | 10              | 9    | 90.0  | 1     | 10.0 |
| Albania         | 8        | 0.0 | 43          | 5.38                | 40              | 13   | 32.5  | 27    | 67.5 |
| Algeria         | 24       | 0.1 | 147         | 6.13                | 121             | 65   | 53.7  | 56    | 46.3 |
| Andorra         | 1        | 0.0 | 13          | 13.00               | 12              | 6    | 50.0  | 6     | 50.0 |
| Angola          | 1        | 0.0 | 14          | 14.00               | 13              | 5    | 38.5  | 8     | 61.5 |
| Argentina       | 100      | 0.2 | 862         | 8.62                | 732             | 410  | 56.0  | 322   | 44.0 |
| Australia       | 836      | 2.1 | 6196        | 7.41                | 5946            | 3440 | 57.9  | 2506  | 42.1 |
| Austria         | 221      | 0.5 | 1990        | 9.00                | 1866            | 1251 | 67.0  | 615   | 33.0 |
| Azerbaijan      | 3        | 0.0 | 6           | 2.00                | 2               | 2    | 100.0 | 0     | 0.0  |
| Bahrain         | 11       | 0.0 | 72          | 6.55                | 71              | 45   | 63.4  | 26    | 36.6 |
| Bangladesh      | 134      | 0.3 | 782         | 5.84                | 701             | 542  | 77.3  | 159   | 22.7 |
| Barbados        | 1        | 0.0 | 1           | 1.00                | 1               | 1    | 100.0 | 0     | 0.0  |
| BELARUS         | 4        | 0.0 | 17          | 4.25                | 17              | 12   | 70.6  | 5     | 29.4 |
| Belgium         | 299      | 0.7 | 2795        | 9.35                | 2539            | 1595 | 62.8  | 944   | 37.2 |
| Belize          | 1        | 0.0 | 2           | 2.00                | 2               | 2    | 100.0 | 0     | 0.0  |
| Benin           | 3        | 0.0 | 19          | 6.33                | 16              | 14   | 87.5  | 2     | 12.5 |
| Bhutan          | 3        | 0.0 | 15          | 5.00                | 13              | 9    | 69.2  | 4     | 30.8 |
| Bolivia         | 2        | 0.0 | 21          | 10.50               | 21              | 12   | 57.1  | 9     | 42.9 |
| Bosnia & Herceg | 12       | 0.0 | 72          | 6.00                | 70              | 32   | 45.7  | 38    | 54.3 |
| Botswana        | 1        | 0.0 | 3           | 3.00                | 3               | 3    | 100.0 | 0     | 0.0  |
| Brazil          | 920      | 2.3 | 7168        | 7.79                | 6928            | 3704 | 53.5  | 3224  | 46.5 |
| Brunei          | 11       | 0.0 | 61          | 5.55                | 59              | 37   | 62.7  | 22    | 37.3 |
| Bulgaria        | 14       | 0.0 | 51          | 3.64                | 49              | 25   | 51.0  | 24    | 49.0 |
| Burkina Faso    | 2        | 0.0 | 16          | 8.00                | 3               | 2    | 66.7  | 1     | 33.3 |

|                |          |       |       |       |           |           |      |
|----------------|----------|-------|-------|-------|-----------|-----------|------|
|                |          |       |       |       |           |           | 100. |
| Burundi        | 1 0.0    | 10    | 10.00 | 1     | 0 0.0     | 1 0       |      |
| Cambodia       | 2 0.0    | 10    | 5.00  | 8     | 7 87.5    | 1 12.5    |      |
| Cameroon       | 8 0.0    | 64    | 8.00  | 46    | 22 47.8   | 24 52.2   |      |
| Canada         | 972 2.4  | 7002  | 7.20  | 6688  | 3848 57.5 | 2840 42.5 |      |
| Chile          | 121 0.3  | 857   | 7.08  | 821   | 508 61.9  | 313 38.1  |      |
| Colombia       | 85 0.2   | 573   | 6.74  | 567   | 379 66.8  | 188 33.2  |      |
| Costa Rica     | 4 0.0    | 19    | 4.75  | 19    | 6 31.6    | 13 68.4   |      |
| Croatia        | 60 0.1   | 409   | 6.82  | 382   | 196 51.3  | 186 48.7  |      |
| Cuba           | 14 0.0   | 181   | 12.93 | 150   | 67 44.7   | 83 55.3   |      |
| Cyprus         | 31 0.1   | 178   | 5.74  | 174   | 115 66.1  | 59 33.9   |      |
| Czech Republic | 75 0.2   | 499   | 6.65  | 465   | 285 61.3  | 180 38.7  |      |
| Dem Rep Congo  | 10 0.0   | 101   | 10.10 | 97    | 77 79.4   | 20 20.6   |      |
| Denmark        | 161 0.4  | 1742  | 10.82 | 1696  | 1022 60.3 | 674 39.7  |      |
| Djibouti       | 1 0.0    | 3     | 3.00  | 3     | 3 100.0   | 0 0.0     |      |
| Dominican Rep  | 3 0.0    | 9     | 3.00  | 8     | 4 50.0    | 4 50.0    |      |
| Ecuador        | 32 0.1   | 206   | 6.44  | 202   | 129 63.9  | 73 36.1   |      |
| Egypt          | 275 0.7  | 1538  | 5.59  | 1463  | 870 59.5  | 593 40.5  |      |
| Estonia        | 10 0.0   | 71    | 7.10  | 70    | 41 58.6   | 29 41.4   |      |
| Ethiopia       | 112 0.3  | 755   | 6.74  | 523   | 420 80.3  | 103 19.7  |      |
| Fiji           | 1 0.0    | 2     | 2.00  | 2     | 1 50.0    | 1 50.0    |      |
| Finland        | 80 0.2   | 637   | 7.96  | 565   | 295 52.2  | 270 47.8  |      |
| France         | 1189 2.9 | 13603 | 11.44 | 12192 | 7556 62.0 | 4636 38.0 |      |
| French Guiana  | 5 0.0    | 63    | 12.60 | 63    | 29 46.0   | 34 54.0   |      |
| Gabon          | 2 0.0    | 12    | 6.00  | 9     | 5 55.6    | 4 44.4    |      |
|                |          |       |       |       |           |           | 100. |
| Gambia         | 1 0.0    | 3     | 3.00  | 3     | 0 0.0     | 3 0       |      |
| Georgia        | 2 0.0    | 9     | 4.50  | 9     | 7 77.8    | 2 22.2    |      |
| Germany        | 1458 3.6 | 13818 | 9.48  | 12680 | 8675 68.4 | 4005 31.6 |      |
| Ghana          | 26 0.1   | 196   | 7.54  | 194   | 154 79.4  | 40 20.6   |      |

|               |      |     |       |       |       |       |       |       |      |
|---------------|------|-----|-------|-------|-------|-------|-------|-------|------|
| Gibraltar     | 3    | 0.0 | 9     | 3.00  | 9     | 6     | 66.7  | 3     | 33.3 |
| Greece        | 233  | 0.6 | 2211  | 9.49  | 2076  | 1262  | 60.8  | 814   | 39.2 |
| Guinea        | 1    | 0.0 | 11    | 11.00 | 10    | 9     | 90.0  | 1     | 10.0 |
| Guyana        | 1    | 0.0 | 7     | 7.00  | 7     | 5     | 71.4  | 2     | 28.6 |
| Haiti         | 1    | 0.0 | 15    | 15.00 | 14    | 10    | 71.4  | 4     | 28.6 |
| Honduras      | 2    | 0.0 | 9     | 4.50  | 5     | 4     | 80.0  | 1     | 20.0 |
| Hungary       | 99   | 0.2 | 717   | 7.24  | 676   | 460   | 68.0  | 216   | 32.0 |
| Iceland       | 9    | 0.0 | 93    | 10.33 | 88    | 54    | 61.4  | 34    | 38.6 |
| India         | 1703 | 4.2 | 10104 | 5.93  | 8864  | 6277  | 70.8  | 2587  | 29.2 |
| Indonesia     | 81   | 0.2 | 530   | 6.54  | 463   | 254   | 54.9  | 209   | 45.1 |
| Iran          | 620  | 1.5 | 4249  | 6.85  | 4099  | 2558  | 62.4  | 1541  | 37.6 |
| Iraq          | 27   | 0.1 | 99    | 3.67  | 90    | 73    | 81.1  | 17    | 18.9 |
| Ireland       | 151  | 0.4 | 1096  | 7.26  | 1021  | 566   | 55.4  | 455   | 44.6 |
| Israel        | 348  | 0.9 | 2318  | 6.66  | 2249  | 1367  | 60.8  | 882   | 39.2 |
| Italy         | 3174 | 7.8 | 33297 | 10.49 | 31478 | 17978 | 57.1  | 13500 | 42.9 |
|               |      |     |       |       |       |       |       | 100.  |      |
| Jamaica       | 1    | 0.0 | 4     | 4.00  | 4     | 0     | 0.0   | 4     | 0    |
| Japan         | 648  | 1.6 | 5217  | 8.05  | 5046  | 3935  | 78.0  | 1111  | 22.0 |
| Jordan        | 84   | 0.2 | 458   | 5.45  | 452   | 268   | 59.3  | 184   | 40.7 |
| Kazakhstan    | 10   | 0.0 | 62    | 6.20  | 57    | 40    | 70.2  | 17    | 29.8 |
| Kenya         | 18   | 0.0 | 124   | 6.89  | 119   | 81    | 68.1  | 38    | 31.9 |
| Kosovo        | 1    | 0.0 | 6     | 6.00  | 6     | 6     | 100.0 | 0     | 0.0  |
| Kuwait        | 33   | 0.1 | 216   | 6.55  | 214   | 146   | 68.2  | 68    | 31.8 |
| Laos          | 1    | 0.0 | 14    | 14.00 | 13    | 8     | 61.5  | 5     | 38.5 |
| Latvia        | 7    | 0.0 | 39    | 5.57  | 39    | 21    | 53.8  | 18    | 46.2 |
| Lebanon       | 56   | 0.1 | 374   | 6.68  | 365   | 202   | 55.3  | 163   | 44.7 |
| Libya         | 13   | 0.0 | 187   | 14.38 | 175   | 102   | 58.3  | 73    | 41.7 |
| Liechtenstein | 3    | 0.0 | 26    | 8.67  | 22    | 18    | 81.8  | 4     | 18.2 |
| Lithuania     | 16   | 0.0 | 84    | 5.25  | 83    | 33    | 39.8  | 50    | 60.2 |
| Luxembourg    | 8    | 0.0 | 67    | 8.38  | 66    | 42    | 63.6  | 24    | 36.4 |

|                 |      |      |       |       |       |       |       |       |      |
|-----------------|------|------|-------|-------|-------|-------|-------|-------|------|
| Madagascar      | 2    | 0.0  | 15    | 7.50  | 11    | 7     | 63.6  | 4     | 36.4 |
| Malawi          | 4    | 0.0  | 38    | 9.50  | 36    | 29    | 80.6  | 7     | 19.4 |
| Malaysia        | 156  | 0.4  | 1011  | 6.48  | 910   | 571   | 62.7  | 339   | 37.3 |
| Maldives        | 2    | 0.0  | 8     | 4.00  | 5     | 2     | 40.0  | 3     | 60.0 |
| Mali            | 1    | 0.0  | 8     | 8.00  | 1     | 1     | 100.0 | 0     | 0.0  |
| Malta           | 17   | 0.0  | 72    | 4.24  | 67    | 39    | 58.2  | 28    | 41.8 |
| Mauritius       | 6    | 0.0  | 20    | 3.33  | 19    | 13    | 68.4  | 6     | 31.6 |
| Mexico          | 273  | 0.7  | 1967  | 7.21  | 1860  | 1234  | 66.3  | 626   | 33.7 |
| Moldova         | 1    | 0.0  | 9     | 9.00  | 8     | 5     | 62.5  | 3     | 37.5 |
| Monaco          | 1    | 0.0  | 14    | 14.00 | 14    | 11    | 78.6  | 3     | 21.4 |
| Montenegro      | 3    | 0.0  | 15    | 5.00  | 15    | 8     | 53.3  | 7     | 46.7 |
| Morocco         | 71   | 0.2  | 456   | 6.42  | 402   | 269   | 66.9  | 133   | 33.1 |
| Mozambique      | 3    | 0.0  | 48    | 16.00 | 48    | 20    | 41.7  | 28    | 58.3 |
| Nepal           | 62   | 0.2  | 291   | 4.69  | 274   | 193   | 70.4  | 81    | 29.6 |
| Netherlands     | 363  | 0.9  | 3057  | 8.42  | 2740  | 1615  | 58.9  | 1125  | 41.1 |
| New Caledonia   | 1    | 0.0  | 6     | 6.00  | 6     | 4     | 66.7  | 2     | 33.3 |
| New Zealand     | 90   | 0.2  | 592   | 6.58  | 562   | 269   | 47.9  | 293   | 52.1 |
| Nicaragua       | 1    | 0.0  | 6     | 6.00  | 6     | 4     | 66.7  | 2     | 33.3 |
| Nigeria         | 101  | 0.2  | 631   | 6.25  | 510   | 359   | 70.4  | 151   | 29.6 |
| North Macedonia | 3    | 0.0  | 12    | 4.00  | 12    | 9     | 75.0  | 3     | 25.0 |
| Norway          | 136  | 0.3  | 952   | 7.00  | 907   | 531   | 58.5  | 376   | 41.5 |
| Oman            | 28   | 0.1  | 228   | 8.14  | 190   | 115   | 60.5  | 75    | 39.5 |
| Pakistan        | 277  | 0.7  | 1425  | 5.14  | 1357  | 911   | 67.1  | 446   | 32.9 |
| Palestine       | 16   | 0.0  | 68    | 4.25  | 67    | 33    | 49.3  | 34    | 50.7 |
| Panama          | 3    | 0.0  | 22    | 7.33  | 21    | 18    | 85.7  | 3     | 14.3 |
| Paraguay        | 4    | 0.0  | 27    | 6.75  | 27    | 18    | 66.7  | 9     | 33.3 |
| Peoples R China | 5861 | 14.4 | 54342 | 9.27  | 47654 | 28229 | 59.2  | 19425 | 40.8 |
| Peru            | 38   | 0.1  | 221   | 5.82  | 216   | 154   | 71.3  | 62    | 28.7 |
| Philippines     | 27   | 0.1  | 152   | 5.63  | 134   | 85    | 63.4  | 49    | 36.6 |
| Poland          | 313  | 0.8  | 1740  | 5.56  | 1693  | 938   | 55.4  | 755   | 44.6 |

|                 |      |     |       |       |       |      |       |      |      |
|-----------------|------|-----|-------|-------|-------|------|-------|------|------|
| Portugal        | 180  | 0.4 | 1214  | 6.74  | 1140  | 536  | 47.0  | 604  | 53.0 |
| Qatar           | 70   | 0.2 | 516   | 7.37  | 472   | 319  | 67.6  | 153  | 32.4 |
| Rep Congo       | 5    | 0.0 | 47    | 9.40  | 46    | 27   | 58.7  | 19   | 41.3 |
| Romania         | 151  | 0.4 | 893   | 5.91  | 871   | 414  | 47.5  | 457  | 52.5 |
| Russia          | 148  | 0.4 | 1316  | 8.89  | 967   | 452  | 46.7  | 515  | 53.3 |
| Rwanda          | 4    | 0.0 | 24    | 6.00  | 22    | 15   | 68.2  | 7    | 31.8 |
| Samoa           | 1    | 0.0 | 3     | 3.00  | 3     | 1    | 33.3  | 2    | 66.7 |
| Saudi Arabia    | 462  | 1.1 | 2794  | 6.05  | 2626  | 1926 | 73.3  | 700  | 26.7 |
| Senegal         | 4    | 0.0 | 42    | 10.50 | 32    | 20   | 62.5  | 12   | 37.5 |
| Serbia          | 66   | 0.2 | 445   | 6.74  | 432   | 199  | 46.1  | 233  | 53.9 |
| Sierra Leone    | 2    | 0.0 | 10    | 5.00  | 10    | 8    | 80.0  | 2    | 20.0 |
| Singapore       | 330  | 0.8 | 2933  | 8.89  | 2802  | 1729 | 61.7  | 1073 | 38.3 |
| Slovakia        | 28   | 0.1 | 112   | 4.00  | 97    | 46   | 47.4  | 51   | 52.6 |
| Slovenia        | 41   | 0.1 | 232   | 5.66  | 213   | 106  | 49.8  | 107  | 50.2 |
| Solomon Islands | 1    | 0.0 | 7     | 7.00  | 7     | 4    | 57.1  | 3    | 42.9 |
| Somalia         | 2    | 0.0 | 13    | 6.50  | 13    | 10   | 76.9  | 3    | 23.1 |
| South Africa    | 199  | 0.5 | 1223  | 6.15  | 795   | 509  | 64.0  | 286  | 36.0 |
| South Australia | 1    | 0.0 | 6     | 6.00  | 1     | 1    | 100.0 | 0    | 0.0  |
| South Korea     | 659  | 1.6 | 4448  | 6.75  | 4208  | 2737 | 65.0  | 1471 | 35.0 |
| Spain           | 1529 | 3.8 | 14091 | 9.22  | 13178 | 7051 | 53.5  | 6127 | 46.5 |
| Sri Lanka       | 24   | 0.1 | 120   | 5.00  | 82    | 51   | 62.2  | 31   | 37.8 |
| Sudan           | 10   | 0.0 | 67    | 6.70  | 63    | 40   | 63.5  | 23   | 36.5 |
| Sweden          | 257  | 0.6 | 2080  | 8.09  | 1960  | 1174 | 59.9  | 786  | 40.1 |
| Switzerland     | 399  | 1.0 | 3230  | 8.10  | 3058  | 1906 | 62.3  | 1152 | 37.7 |
| Syria           | 5    | 0.0 | 14    | 2.80  | 13    | 9    | 69.2  | 4    | 30.8 |
| Taiwan          | 316  | 0.8 | 2091  | 6.62  | 1985  | 1251 | 63.0  | 734  | 37.0 |
| Tanzania        | 3    | 0.0 | 7     | 2.33  | 6     | 5    | 83.3  | 1    | 16.7 |
| Thailand        | 115  | 0.3 | 867   | 7.54  | 772   | 430  | 55.7  | 342  | 44.3 |
| Togo            | 2    | 0.0 | 39    | 19.50 | 35    | 25   | 71.4  | 10   | 28.6 |
| Trinidad Tobago | 2    | 0.0 | 10    | 5.00  | 9     | 6    | 66.7  | 3    | 33.3 |

|                 |      |      |       |       |       |       |      |       |      |
|-----------------|------|------|-------|-------|-------|-------|------|-------|------|
| Tunisia         | 34   | 0.1  | 399   | 11.74 | 398   | 222   | 55.8 | 176   | 44.2 |
| Turkey          | 1011 | 2.5  | 5927  | 5.86  | 5744  | 3476  | 60.5 | 2268  | 39.5 |
| U Arab Emirates | 116  | 0.3  | 724   | 6.24  | 684   | 448   | 65.5 | 236   | 34.5 |
| Uganda          | 16   | 0.0  | 123   | 7.69  | 116   | 86    | 74.1 | 30    | 25.9 |
| UK              | 2372 | 5.8  | 24732 | 10.43 | 20298 | 11930 | 58.8 | 8368  | 41.2 |
| Ukraine         | 8    | 0.0  | 54    | 6.75  | 37    | 24    | 64.9 | 13    | 35.1 |
| Uruguay         | 9    | 0.0  | 65    | 7.22  | 52    | 28    | 53.8 | 24    | 46.2 |
| USA             | 9274 | 22.8 | 75875 | 8.18  | 73267 | 42665 | 58.2 | 30602 | 41.8 |
| Uzbekistan      | 1    | 0.0  | 5     | 5.00  | 4     | 1     | 25.0 | 3     | 75.0 |
| Vatican         | 4    | 0.0  | 19    | 4.75  | 17    | 14    | 82.4 | 3     | 17.6 |
| Venezuela       | 7    | 0.0  | 46    | 6.57  | 43    | 23    | 53.5 | 20    | 46.5 |
| Vietnam         | 97   | 0.2  | 824   | 8.49  | 781   | 516   | 66.1 | 265   | 33.9 |
| Yemen           | 12   | 0.0  | 71    | 5.92  | 69    | 55    | 79.7 | 14    | 20.3 |
| Zambia          | 2    | 0.0  | 44    | 22.00 | 38    | 32    | 84.2 | 6     | 15.8 |
| Zimbabwe        | 11   | 0.0  | 38    | 3.45  | 35    | 28    | 80.0 | 7     | 20.0 |

---
